# Supplementary material for: Anti-Inflammatory Activity of Geraniol Isolated from Lemon Grass on Ox-LDL-Stimulated Endothelial Cells by Upregulation of Heme Oxygenase-1 via PI3K/Akt and Nrf-2 Signaling Pathways
Source: MDPI journal article supplement (doi:10.3390/nu14224817), 2022-11-14
Supplement: s1 [file s1]

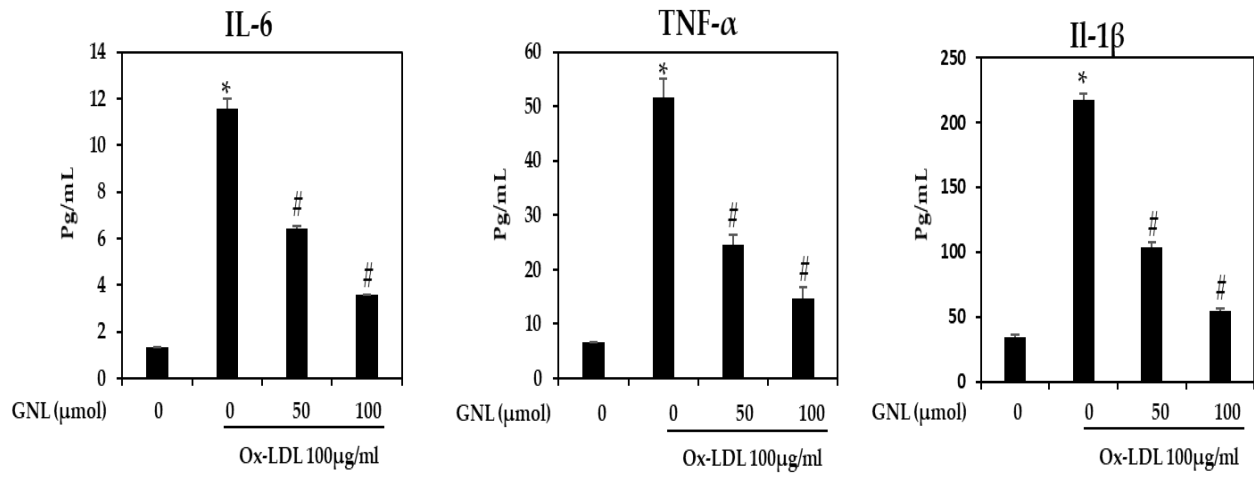

**Figure S1.** GNL mitigated Ox-LDL-induced cytokine production in endothelial cells. HUVECs cells were treated with the GNL and/or Ox-LDL for 24 h. Level of TNF- $\alpha$ , IL-6 and IL-1 $\beta$ , was assessed by ELISA. There are three replicates of each value, and \*  $p < 0.05$  represents a significant difference when compared to a control group. The #  $p < 0.05$  represents significant differences between Ox-LDL alone and GNL with Ox-LDL treatment groups.

# SUPPLEMENTARY TABLES

**Table S1. Antibody details of the proteins used in immunoblot analysis**

| <b>Antibody</b>                 | <b>Molecular weight (kDa)</b> | <b>Company catalogue</b>                                             | <b>Dilution</b> |
|---------------------------------|-------------------------------|----------------------------------------------------------------------|-----------------|
| <b>TNF-<math>\alpha</math></b>  | 17                            | (#PA5-19810) Thermo Fisher Scientific, Inc. (Waltham, MA, USA)       | 1:5000          |
| <b>IL-6</b>                     | 21                            | #P620 Thermo Fisher Scientific, Inc. (Waltham, MA, USA)              | 1:5000          |
| <b>IL-1<math>\beta</math></b>   | 17                            | (#PBOIL1BI) Thermo Fisher Scientific, Inc. (Waltham, MA, USA)        | 1:5000          |
| <b>ICAM-1</b>                   | 72                            | (#MA5407) Thermo Fisher Scientific, Inc. (Waltham, MA, USA)          | 1:5000          |
| <b>VCAM-1</b>                   | 98                            | # PA5-87406 Thermo Fisher Scientific, Inc. (Waltham, MA, USA)        | 1:3000          |
| <b>HO-1</b>                     | 32                            | (#PA5-77833) Thermo Fisher Scientific, Inc. (Waltham, MA, USA)       | 1:5000          |
| <b>NQO-1</b>                    | 31                            | (#PA5-82294 Thermo Fisher Scientific, Inc. (Waltham, MA, USA)        | 1:1000          |
| <b><math>\gamma</math>-GCLC</b> | 73                            | (#PA5-44190), Thermo Fisher Scientific, Inc. (Waltham, MA, USA)      | 1:5000          |
| <b>p-P65</b>                    | 65                            | (#MA5-15160), Thermo Fisher Scientific, Inc. (Waltham, MA, USA)      | 1:2000          |
| <b>p-IKBA</b>                   | 36                            | (#PA5-36653) Thermo Fisher Scientific, Inc. (Waltham, MA, USA)       | 1:2000          |
| <b>FABP4</b>                    | 15                            | PA5-30591 Thermo Fisher Scientific, Inc. (Waltham, MA, USA)          | 1:2000          |
| <b>TGF-<math>\beta</math>-1</b> | 13                            | # <b>MA5-23795</b> Thermo Fisher Scientific, Inc. (Waltham, MA, USA) | 1:1000          |
| <b>pPI3K</b>                    | 85                            | PA5-104853 Thermo Fisher Scientific, Inc. (Waltham, MA, USA)         | 1:2000          |
| <b>PI3K</b>                     | 85                            | #PA5-29220 Thermo Fisher Scientific, Inc. (Waltham, MA, USA)         | 1:2000          |
| <b>pAKT</b>                     | 60                            | Cat #44-602G Thermo Fisher Scientific, Inc. (Waltham, MA, USA)       | 1:5000          |
| <b>AKt</b>                      | 60                            | Cat #44-609G Thermo Fisher Scientific, Inc. (Waltham, MA, USA)       | 1:2000          |

|                                              |    |                                                          |          |
|----------------------------------------------|----|----------------------------------------------------------|----------|
| <b>Nrf2</b>                                  | 62 | (AB-M-018) MOLEQULE-ON (New Lynn, Auckland, New Zealand) | 1:5000   |
| <b>secondary antibodies goat anti-rabbit</b> | -  | (AB-M-010) MOLEQULE-ON (New Lynn, Auckland, New Zealand) | 1:10,000 |
| <b>secondary goat anti-mouse</b>             | -  | (AB-M-009) MOLEQULE-ON (New Lynn, Auckland, New Zealand) | 1:10,000 |
| <b>β-actin</b>                               | 43 | (AB-M-003) MOLEQULE-ON (New Lynn, Auckland, New Zealand) | 1:10,000 |

**Table S2. Primer sequences**

| Gene           | Sequences                                                                 |
|----------------|---------------------------------------------------------------------------|
| IL-6           | Forward: GGTACATCCTCGACGGCATCT<br>Reverse: GTGCCTCTTTGCTGCTTTCAC          |
| VCAM-1         | Forward: CAAATCCTTGATACTGCTCATC<br>Reverse: TTGACTTCTTGCTCACAGC           |
| ICAM-1         | Forward: TATGGCAACGACTCCTTCT<br>Reverse: CATTGAGCGTCACCT TGG              |
| $\beta$ -Actin | Forward: CTGGCACCACACCTTCTACAATGAGC<br>Reverse: GAGGATCTTCATGAGGTAGTCAGTC |
